# Supplementary figures and images for: Flexible perovskite solar cells fabricated by a gradient heat treatment process
Source: Royal Society of Chemistry journal article supplement (doi:10.1039/c9se00933g), 2019-11-22

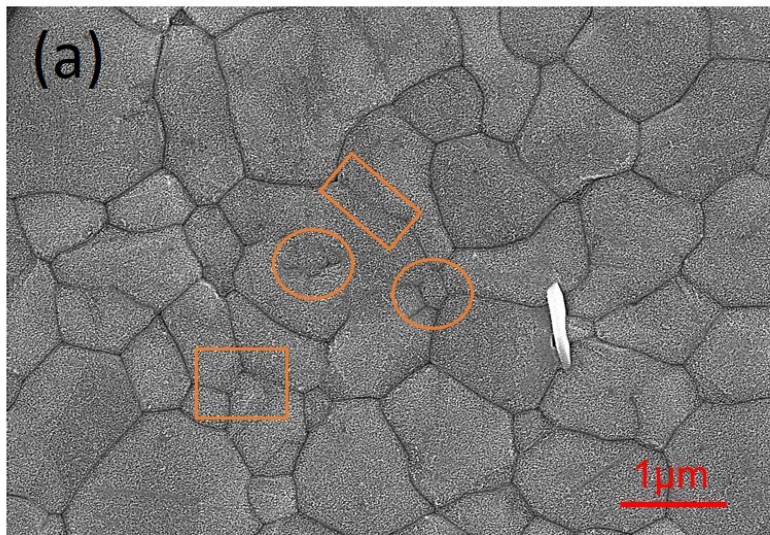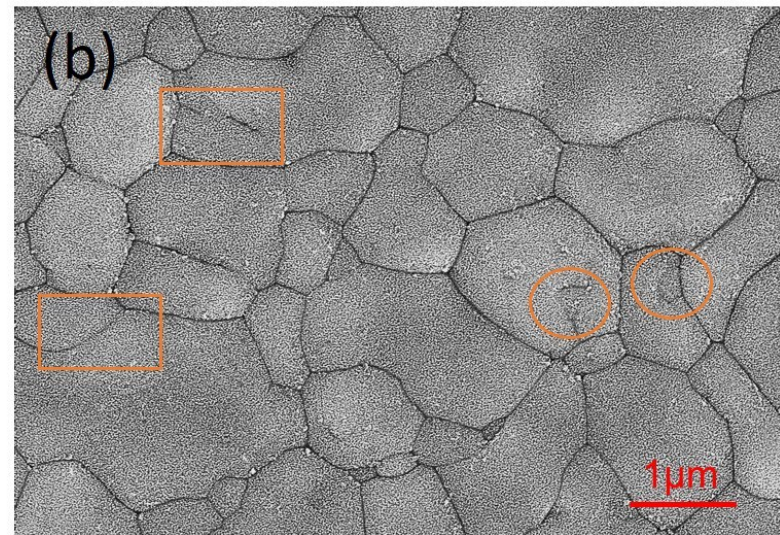

Supplement: c9se00933g1.pdf [file c9se00933g1.pdf]
